# Supplementary material for: Piezoelectric ferromagnetism in Janus monolayer YBrI: a first-principles prediction
Source: Royal Society of Chemistry journal article supplement (doi:10.1039/d2cp05046c), 2022-11-29
Supplement: d2cp05046c1.pdf [file d2cp05046c1.pdf]

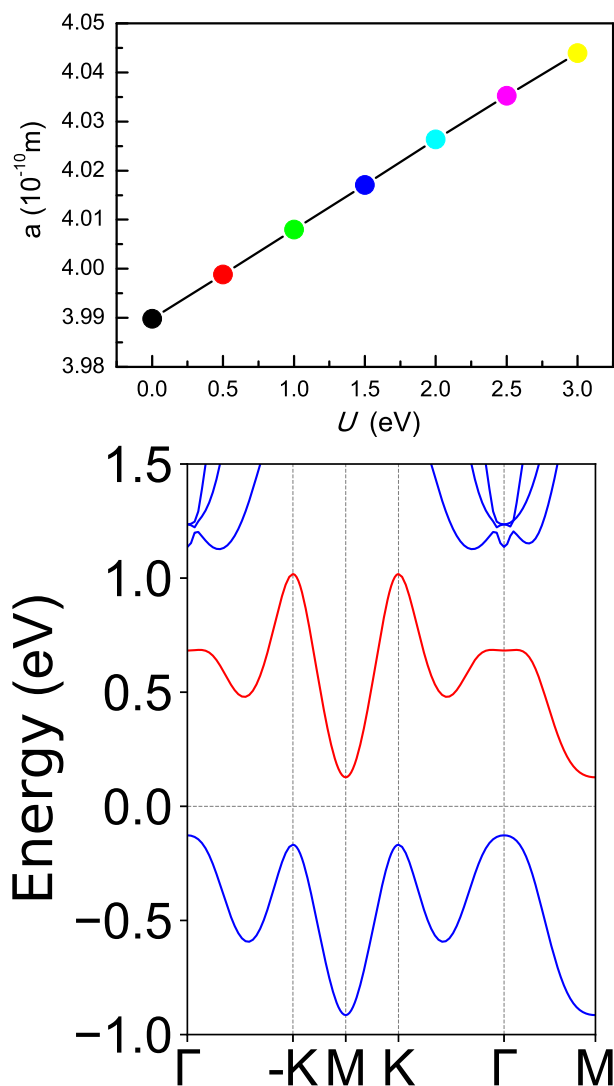

FIG. 1. (Color online) Top: the lattice constants  $a$  of YBrI as a function of  $U$ . Bottom: the energy band structures of YBrI without SOC and  $U=0$  eV.

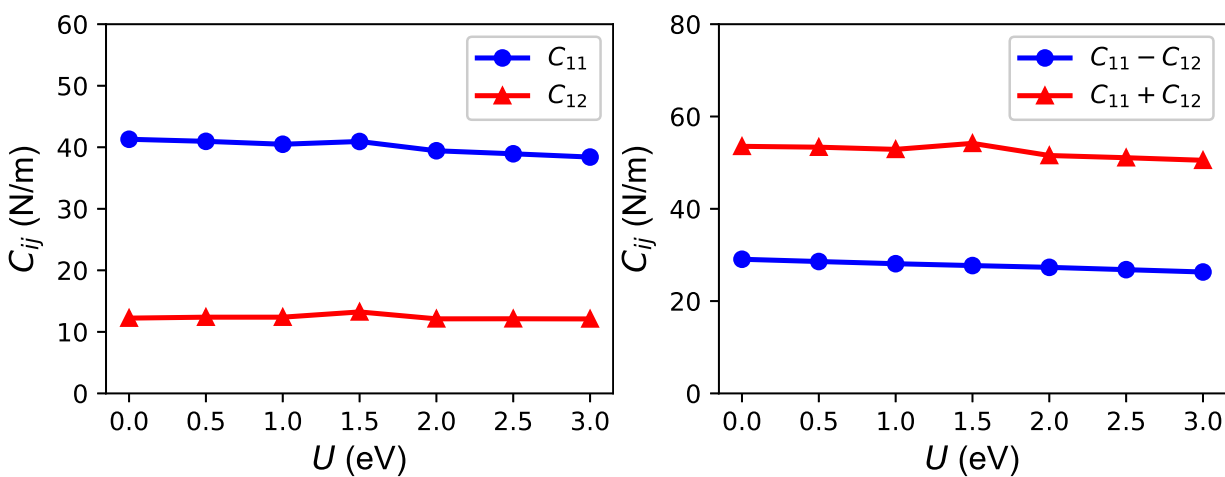

FIG. 2. (Color online) For monolayer YBrI, the elastic constants  $C_{ij}$  as a function of  $U$ .

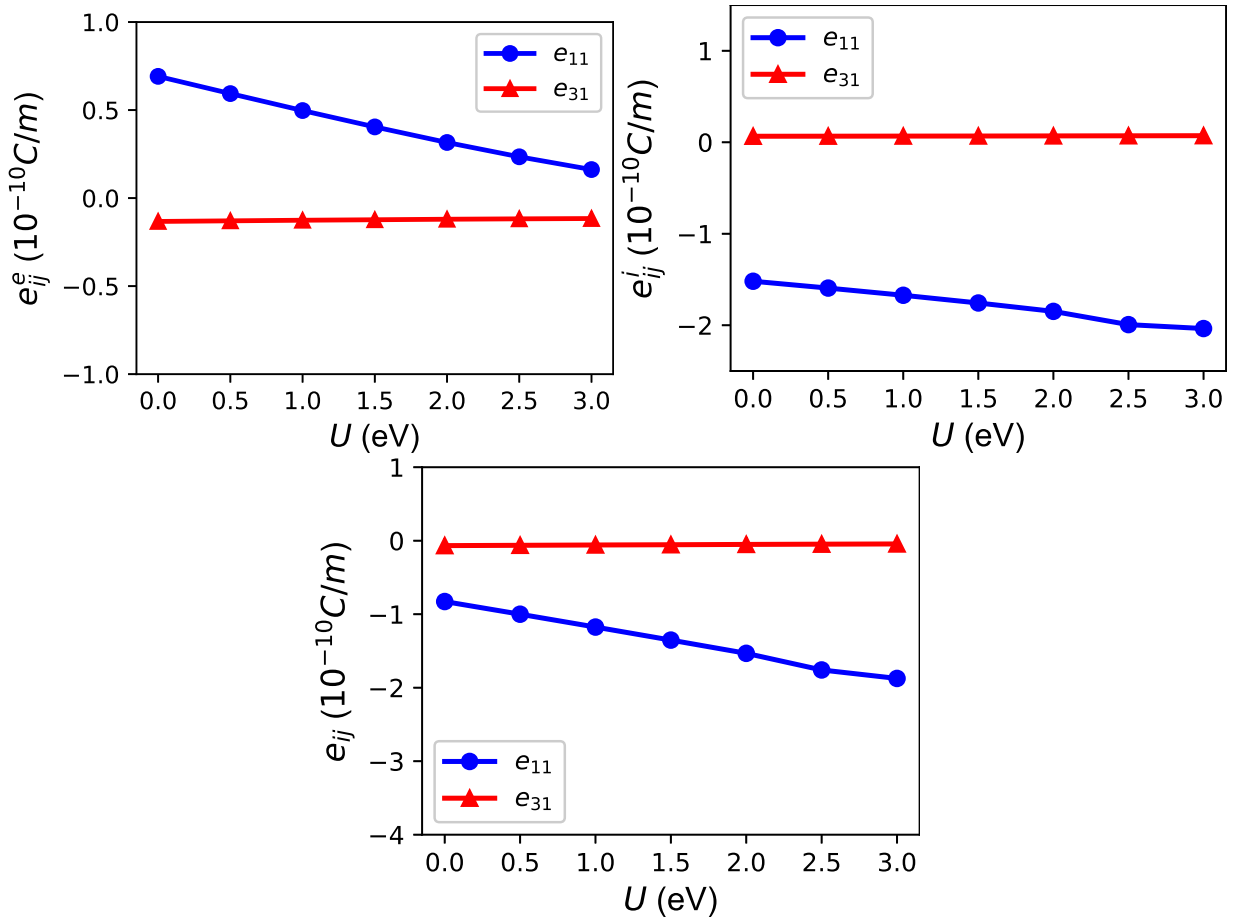

FIG. 3. (Color online) For monolayer YBrI, the piezoelectric stress coefficient ( $e_{ij}$ ) along with the ionic contribution and electronic contribution as a function of  $U$ .

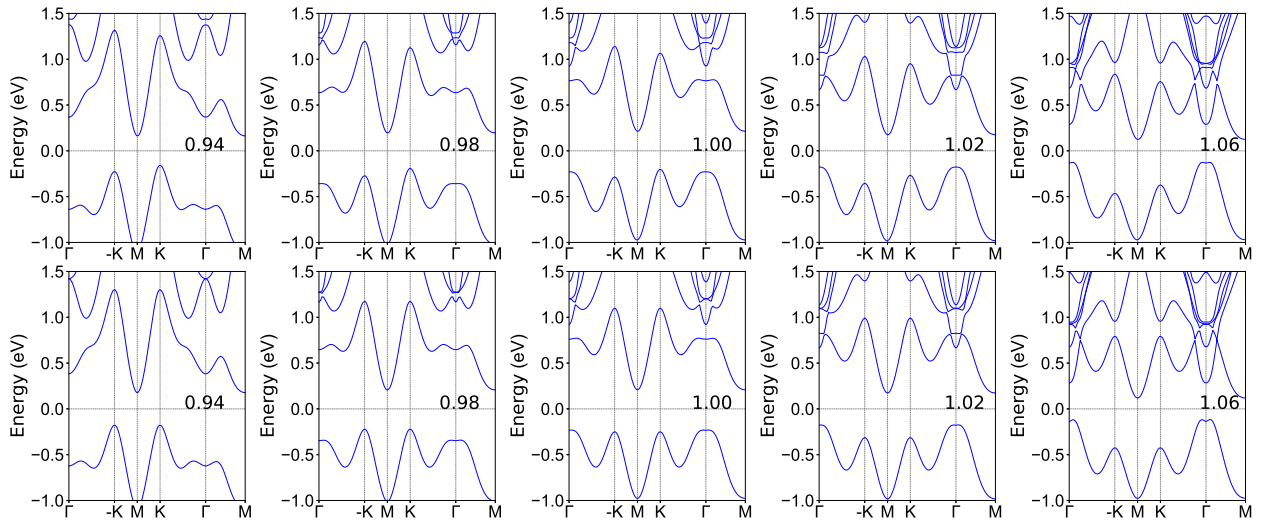

FIG. 4. (Color online) The energy band structures of YBrI monolayer with out-of-plane (Top) and in-plane (Bottom) magnetic anisotropy by using GGA+SOC at some representative  $a/a_0$  values.

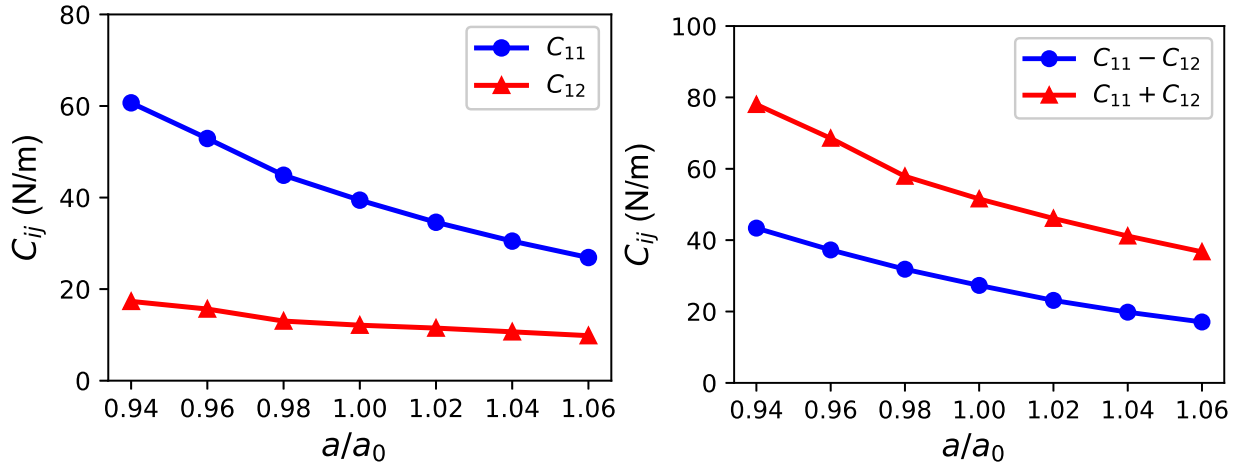

FIG. 5. (Color online) For monolayer YBrI, the elastic constants  $C_{ij}$  as a function of  $a/a_0$ .

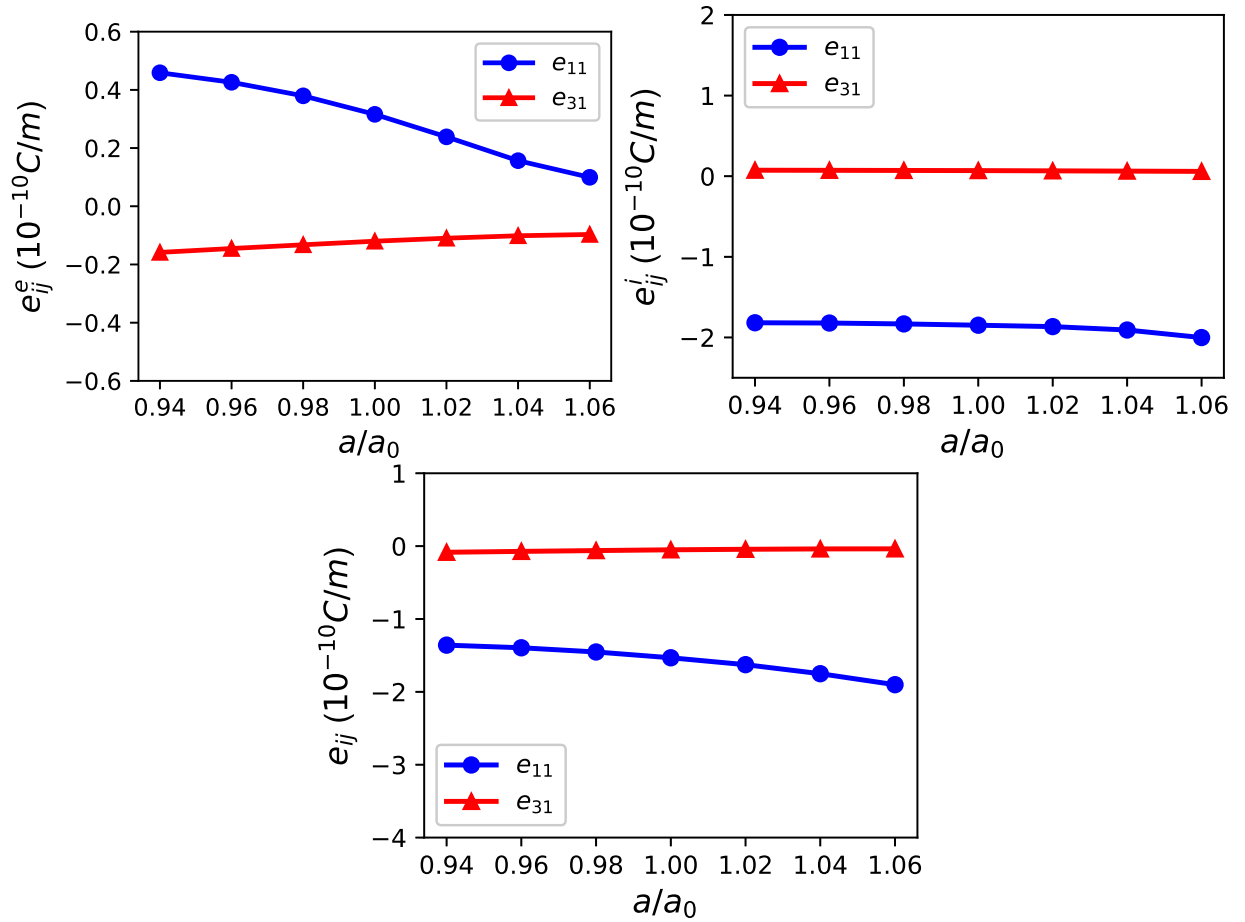

FIG. 6. (Color online) For monolayer YBrI, the piezoelectric stress coefficient ( $e_{ij}$ ) along with the ionic contribution and electronic contribution as a function of  $a/a_0$ .

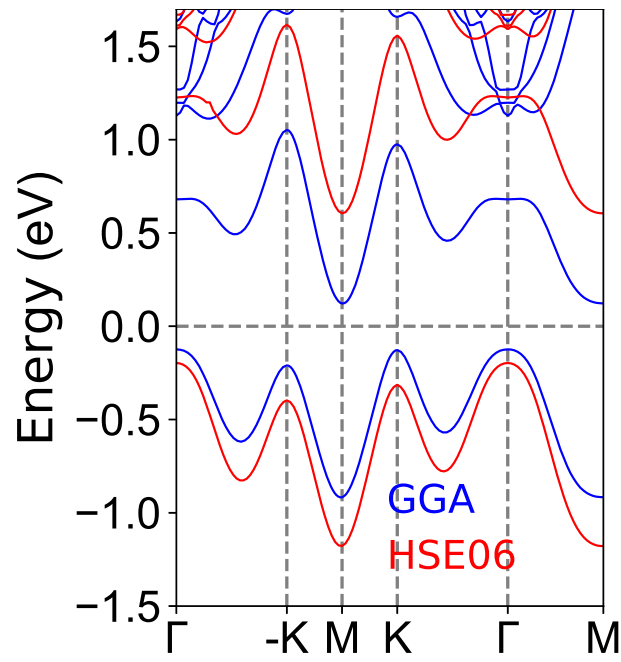

FIG. 7. (Color online) By using GGA+SOC and HSE06+SOC, the energy band structures of YBrI with out-of-plane case.
